# Supplementary material
Source: PubMed Central journal article supplement (PMC6727250)

1 **Supplemental Table of Contents**

2 **Supplementary Figure 1.** Gprc5b expression in various mouse models of  
3 glomerulopathy.

4 **Supplementary Figure 2.** Histological evaluation of kidneys 36h after LPS-injection.

5 **Supplementary Figure 3.** Table of the most significantly affected pathways in Gprc5b-  
6 cKO glomeruli when compared to control glomeruli collected 24h after the LPS  
7 injection.

8 **Supplementary Figure 4.** Comparison of glomerular transcriptomes between 0 and  
9 24h after LPS injection in control animals.

10 **Supplementary Figure 5.** Analysis of different pathways up-stream of NF- $\kappa$ B  
11 activation in Gprc5b-expressing cells.

12 **Supplementary Spreadsheet 1.** RNAseq data in Gprc5b-cKO and control glomeruli  
13 24h after the injection of LPS.

14 **Supplementary Spreadsheet 2.** RNAseq data in wild type glomeruli 0h and 24h after  
15 the injection of LPS.

16

17 **Supplementary Figure 1. Gprc5b expression in various mouse models of**  
18 **glomerulopathy. (A)** Microarray data extracted from previously published data sets  
19 (23-27) and an in-house data sets (db/db in 129 male mice, adriamycin nephropathy in  
20 8-week old BALB/c male mice). In LPS-induced glomerular damage a strong up-  
21 regulation of Gprc5b is detected whereas other models do not show significant changes  
22 or no consistent induction. NPH=nephrin KO, DMS=diffuse mesangial sclerosis  
23 (Denysh-Drash syndrome), VHL=von-hippel-lindau nephropathy; OVE26=Ove26  
24 mice overexpressing calmodulin in pancreatic  $\beta$ -cells, ADM=Adriamycin-induced  
25 nephropathy. (B) qPCR analysis of Gprc5b expression in glomeruli isolated from  
26 streptozotocin-induced nephropathy (STZ, 8-week old FVB male mice) shows  
27 significant up-regulation of Gprc5b.

28

29 **Supplementary Figure 2. Histological evaluation of kidneys 36h after LPS-**  
30 **injection. (A)** Histological analysis (PAS staining) of kidneys 36h after the LPS  
31 injection shows apparently normal morphology in Gprc5b-cKO and control samples.  
32 (B) Both Gprc5b-cKO and control mice exhibit podocyte foot process effacement 36h  
33 after the injection, but no significant difference between groups is detected by counting  
34 numbers of slits / GBM length. Magnifications: x40 in A; Scale bar: B = 250nm.

35

36 **Supplementary Figure 3. Table of the most significantly affected pathways in**  
37 **Gprc5b-cKO glomeruli when compared to control glomeruli collected 24h after**  
38 **the LPS injection.** A total of 164 significantly affected pathways was identified, here  
39 we show the 40 most significantly affected pathways ( $P < 0.001$  and  $FDR < 0.1$ ).

40

41 **Supplementary Figure 4. Comparison of glomerular transcriptomes between 0**  
42 **and 24h after LPS injection in control animals.** (A) The expression of five family  
43 members of NF- $\kappa$ B are significantly up-regulated after 24h when compared to  
44 glomeruli collected from uninjected (0h) glomeruli as shown by RNA sequencing. (B)  
45 The expression of down-stream targets of NF- $\kappa$ B activation, TNF- $\alpha$ , IL-6, IL-1 $\beta$ ,  
46 ICAM1, NF- $\kappa$ B inhibitor alpha (NF- $\kappa$ BIA) and NF- $\kappa$ B inhibitor beta (NF- $\kappa$ BIB) are up-  
47 regulated 24h after LPS-injection. \* p<0.05.

48

49 **Supplementary Figure 5. Analysis of different pathways up-stream of NF- $\kappa$ B**  
50 **activation in Gprc5b-expressing cells.** (A) No significant differences were detected  
51 in the levels of activation of FYN, STAT3, Smad2, ERK, AKT and caspase 3 between  
52 Gprc5b over-expressing and control cells as shown by Western blotting for activated  
53 forms of these proteins. Actin was used as a loading control. (B-C) Inhibition of EGF-  
54 activation with AG1478 does not affect the activation of P65 as detected by blotting for  
55 the phosphorylated form of the protein. (D-E) Inhibition of  $\beta$ -catenin pathway with  
56 IWP-2 does not affect the activation of P65 as detected by blotting for the  
57 phosphorylated form of the protein.

58

# Supplementary figure 1

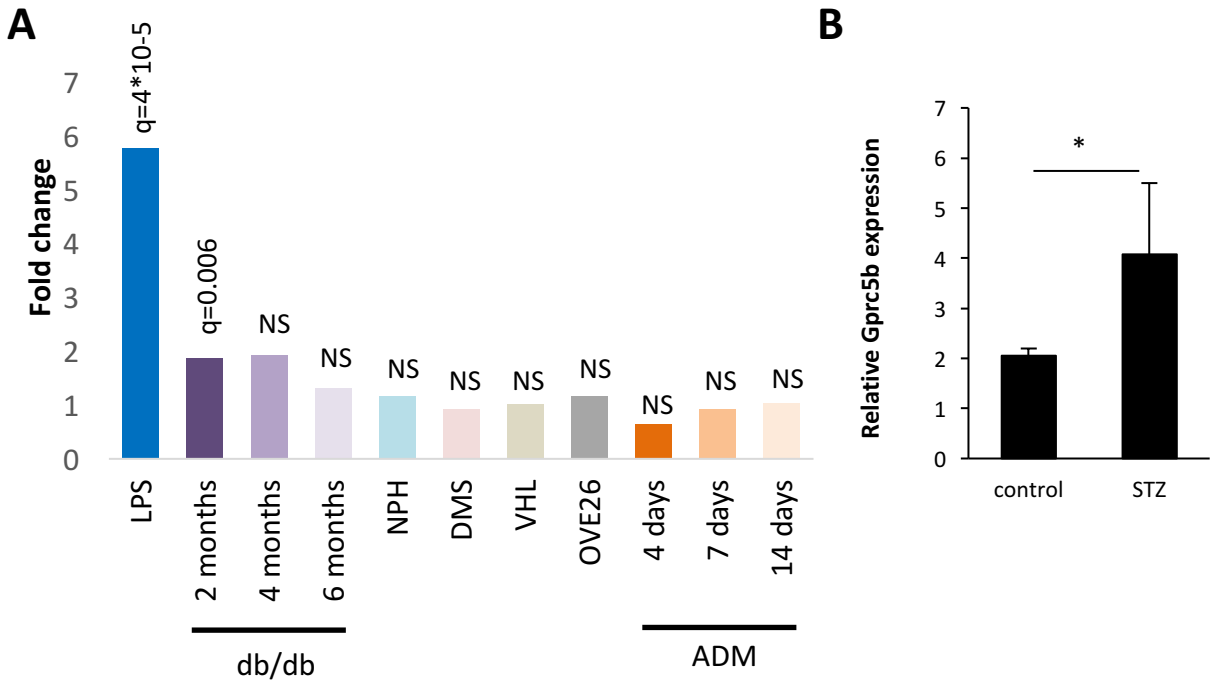

# Supplementary Figure 2

**A**

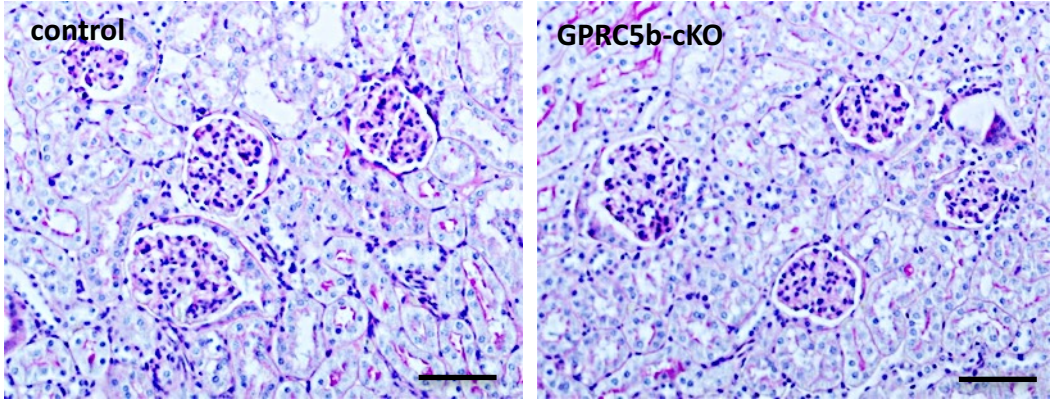

**B**

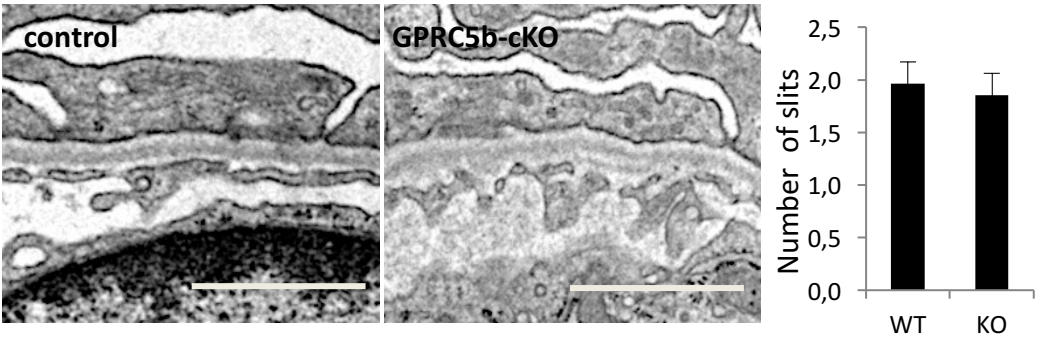

## Supplementary Figure 3

| Pathway Ids   | Descriptions                                                | Matched genes | P values | FDR  |
|---------------|-------------------------------------------------------------|---------------|----------|------|
| path:mmu00030 | Pentose phosphate pathway - Mus musculus                    | 29 of 31      | 0.00     | 0.01 |
| path:mmu00040 | Pentose and glucuronate interconversions - Mus musculus     | 32 of 36      | 0.00     | 0.01 |
| path:mmu00053 | Ascorbate and aldarate metabolism - Mus musculus            | 23 of 27      | 0.00     | 0.01 |
| path:mmu00140 | Steroid hormone biosynthesis - Mus musculus                 | 57 of 87      | 0.00     | 0.01 |
| path:mmu00190 | Oxidative phosphorylation - Mus musculus                    | 133 of 139    | 0.00     | 0.01 |
| path:mmu00230 | Purine metabolism - Mus musculus                            | 173 of 179    | 0.00     | 0.01 |
| path:mmu00240 | Pyrimidine metabolism - Mus musculus                        | 102 of 104    | 0.00     | 0.01 |
| path:mmu00562 | Inositol phosphate metabolism - Mus musculus                | 69 of 70      | 0.00     | 0.01 |
| path:mmu00591 | Linoleic acid metabolism - Mus musculus                     | 33 of 50      | 0.00     | 0.01 |
| path:mmu00630 | Glyoxylate and dicarboxylate metabolism - Mus musculus      | 29 of 30      | 0.00     | 0.01 |
| path:mmu00640 | Propanoate metabolism - Mus musculus                        | 31 of 31      | 0.00     | 0.01 |
| path:mmu00830 | Retinol metabolism - Mus musculus                           | 63 of 89      | 0.00     | 0.01 |
| path:mmu00980 | Metabolism of xenobiotics by cytochrome P450 - Mus musculus | 58 of 65      | 0.00     | 0.01 |
| path:mmu00983 | Drug metabolism - other enzymes - Mus musculus              | 45 of 51      | 0.00     | 0.01 |
| path:mmu03008 | Ribosome biogenesis in eukaryotes - Mus musculus            | 78 of 83      | 0.00     | 0.01 |
| path:mmu03010 | Ribosome - Mus musculus                                     | 136 of 148    | 0.00     | 0.01 |
| path:mmu03013 | RNA transport - Mus musculus                                | 156 of 170    | 0.00     | 0.01 |
| path:mmu03015 | mRNA surveillance pathway - Mus musculus                    | 88 of 96      | 0.00     | 0.01 |
| path:mmu03018 | RNA degradation - Mus musculus                              | 73 of 83      | 0.00     | 0.01 |
| path:mmu03020 | RNA polymerase - Mus musculus                               | 30 of 30      | 0.00     | 0.01 |
| path:mmu03030 | DNA replication - Mus musculus                              | 35 of 35      | 0.00     | 0.01 |
| path:mmu03040 | Spliceosome - Mus musculus                                  | 129 of 135    | 0.00     | 0.01 |
| path:mmu03050 | Proteasome - Mus musculus                                   | 45 of 45      | 0.00     | 0.01 |
| path:mmu03060 | Protein export - Mus musculus                               | 27 of 31      | 0.00     | 0.01 |
| path:mmu03410 | Base excision repair - Mus musculus                         | 35 of 35      | 0.00     | 0.01 |
| path:mmu04060 | Cytokine-cytokine receptor interaction - Mus musculus       | 232 of 265    | 0.00     | 0.01 |
| path:mmu04062 | Chemokine signaling pathway - Mus musculus                  | 186 of 198    | 0.00     | 0.01 |
| path:mmu04064 | NF-kappa B signaling pathway - Mus musculus                 | 94 of 104     | 0.00     | 0.01 |
| path:mmu04080 | Neuroactive ligand-receptor interaction - Mus musculus      | 207 of 285    | 0.00     | 0.01 |
| path:mmu04110 | Cell cycle - Mus musculus                                   | 123 of 125    | 0.00     | 0.01 |
| path:mmu04120 | Ubiquitin mediated proteolysis - Mus musculus               | 139 of 145    | 0.00     | 0.01 |
| path:mmu04141 | Protein processing in endoplasmic reticulum - Mus musculus  | 162 of 167    | 0.00     | 0.01 |
| path:mmu04142 | Lysosome - Mus musculus                                     | 119 of 124    | 0.00     | 0.01 |
| path:mmu04144 | Endocytosis - Mus musculus                                  | 272 of 294    | 0.00     | 0.01 |

# Supplementary Figure 4

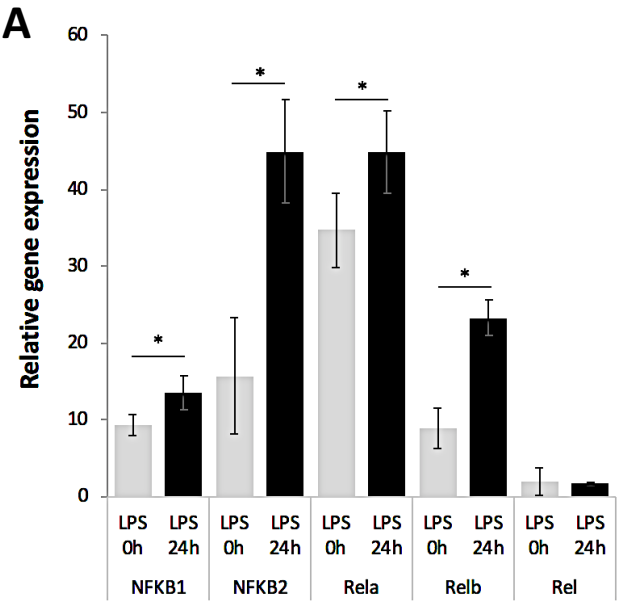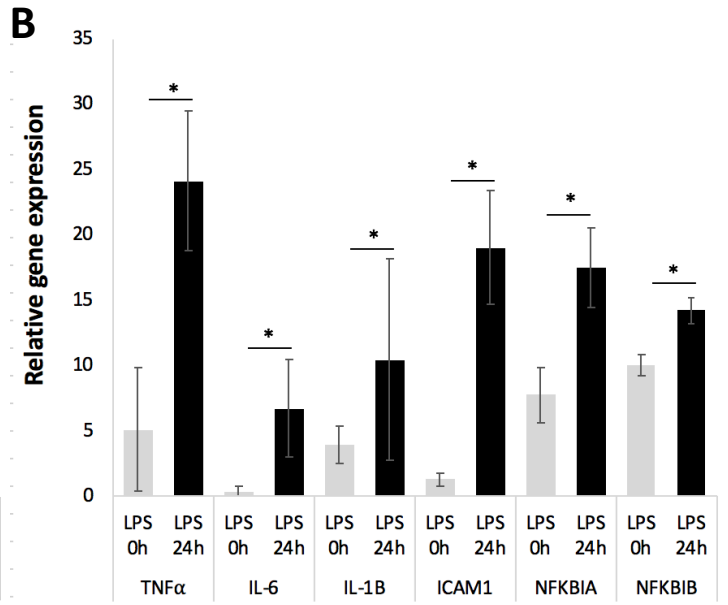

# Supplementary figure 5

**A**

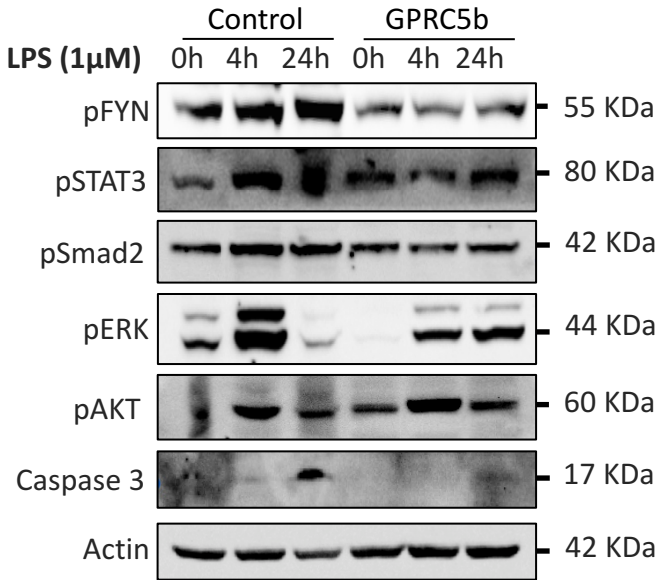

**B**

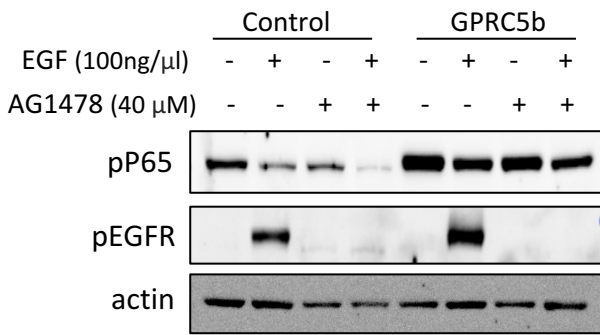

**C**

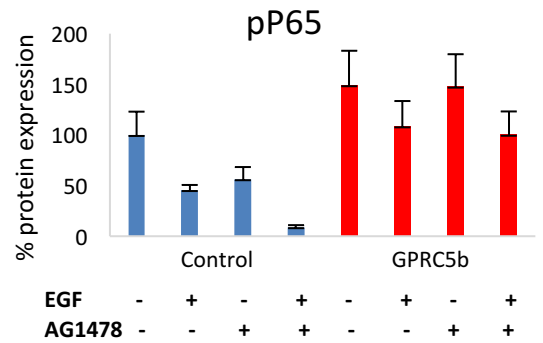

**D**

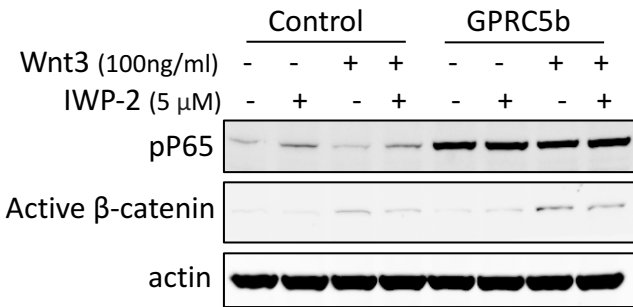

**E**

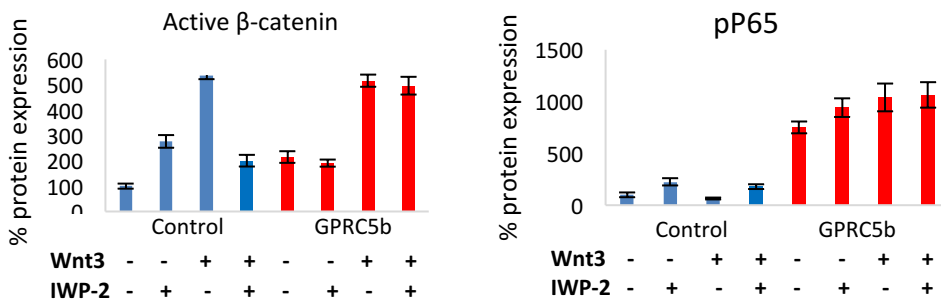

Supplement: ASN.2019010089SupplementaryData.pdf [file ASN.2019010089SupplementaryData.pdf]
